# Supplementary material for: Hybrid electrolyte enables safe and practical 5 V LiNi0.5Mn1.5O4 batteries
Source: Royal Society of Chemistry journal article supplement (doi:10.1039/c9ta04147h), 2019-01-01
Supplement: c9ta04147h1.pdf [file c9ta04147h1.pdf]

Electronic Supplementary Information for

**Hybrid electrolyte enables safe and practical 5-V  $\text{LiNi}_{0.5}\text{Mn}_{1.5}\text{O}_4$  batteries**

Purna Chandra Rath, Chia-Jung Wu, Jagabandhu Patra, Ju Li\*, Tai-Chou Lee,

Ting-Ju Yeh, Jeng-Kuei Chang\*

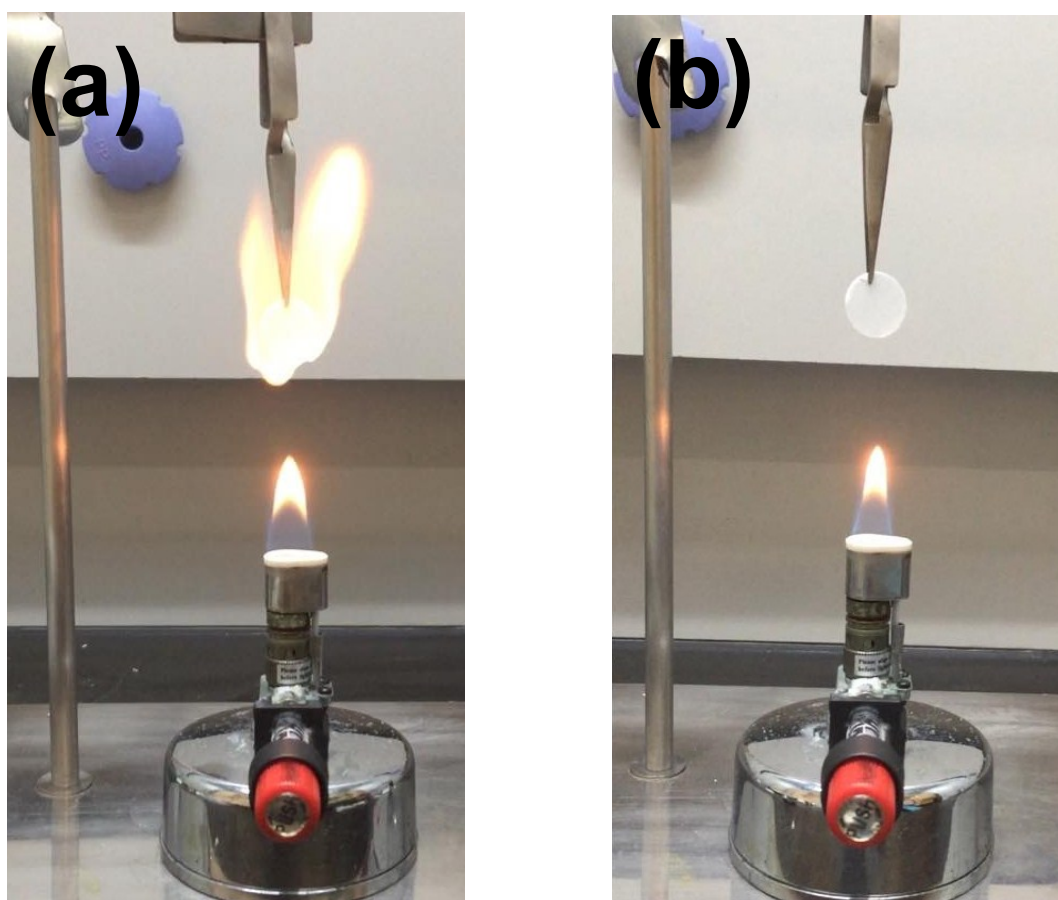

**Figure S1.** Flammability testing results of (a) 1 M  $\text{LiPF}_6/\text{EC}:\text{DEC}$  and (b) 1 M  $\text{LiTFSI}/\text{PMP}-\text{TFSI IL}$  electrolytes.

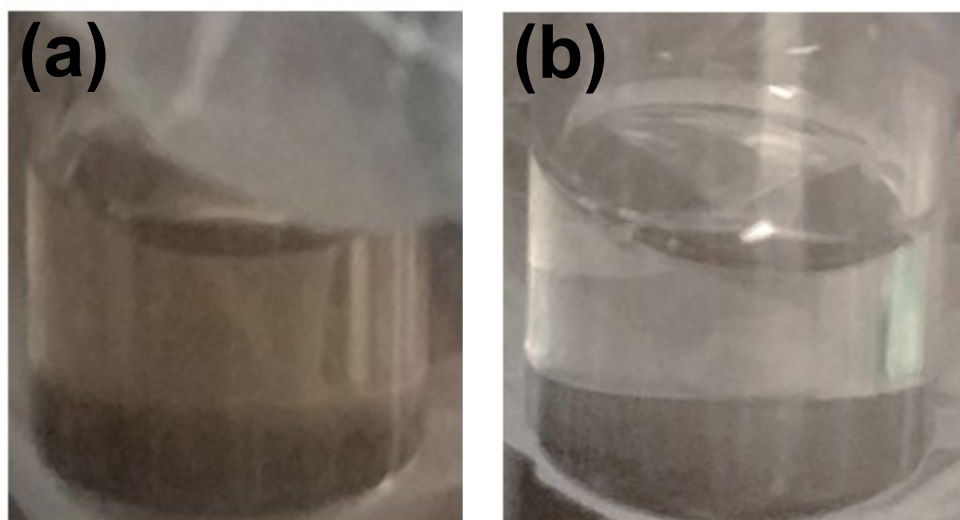

| (c) Electrolyte               | Mn concentration | Ni concentration |
|-------------------------------|------------------|------------------|
| 1 M LiPF <sub>6</sub> /EC:DEC | 514 ppm          | 103 ppm          |
| 1 M LiTFSI/PMP-TFSI           | Not detectable   | Not detectable   |

**Figure S2.** Immersion tests of LNMO powder (0.5 g) in 2 mL of (a) 1 M LiPF<sub>6</sub>/EC:DEC and (b) 1 M LiTFSI/PMP-TFSI IL electrolytes after 1 month. (c) Concentrations of Mn and Ni dissolved in the electrolytes.

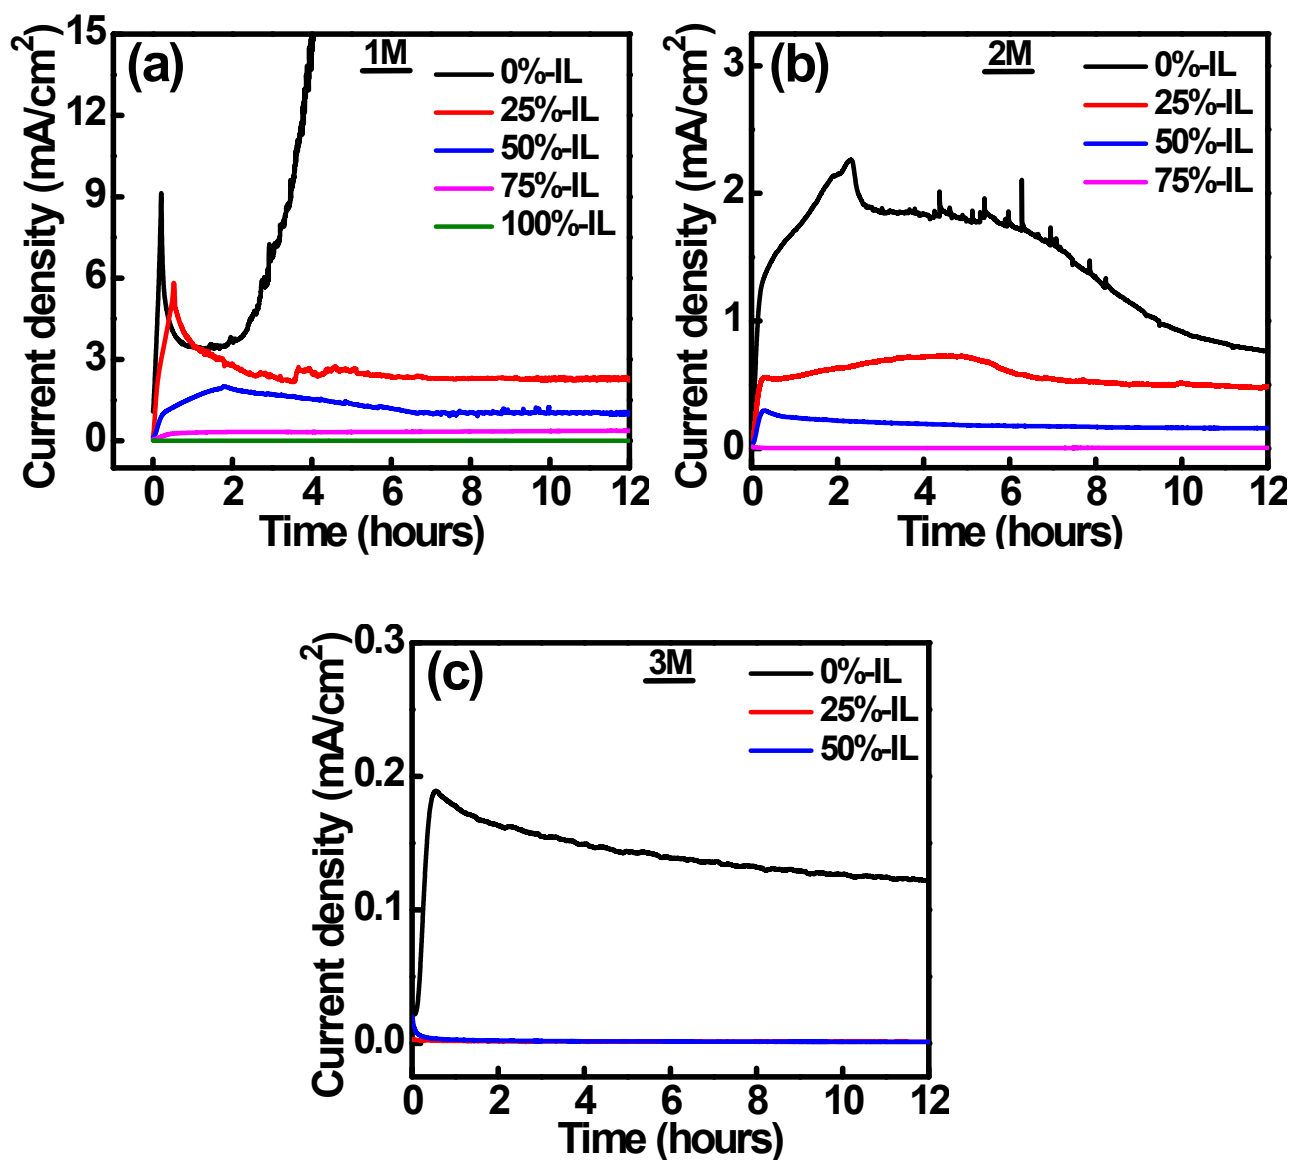

**Figure S3.** Chronoamperometry data of Al electrodes recorded in various electrolytes with (a) 1 M, (b) 2 M, and (c) 3 M LiTFSI at 5 V.

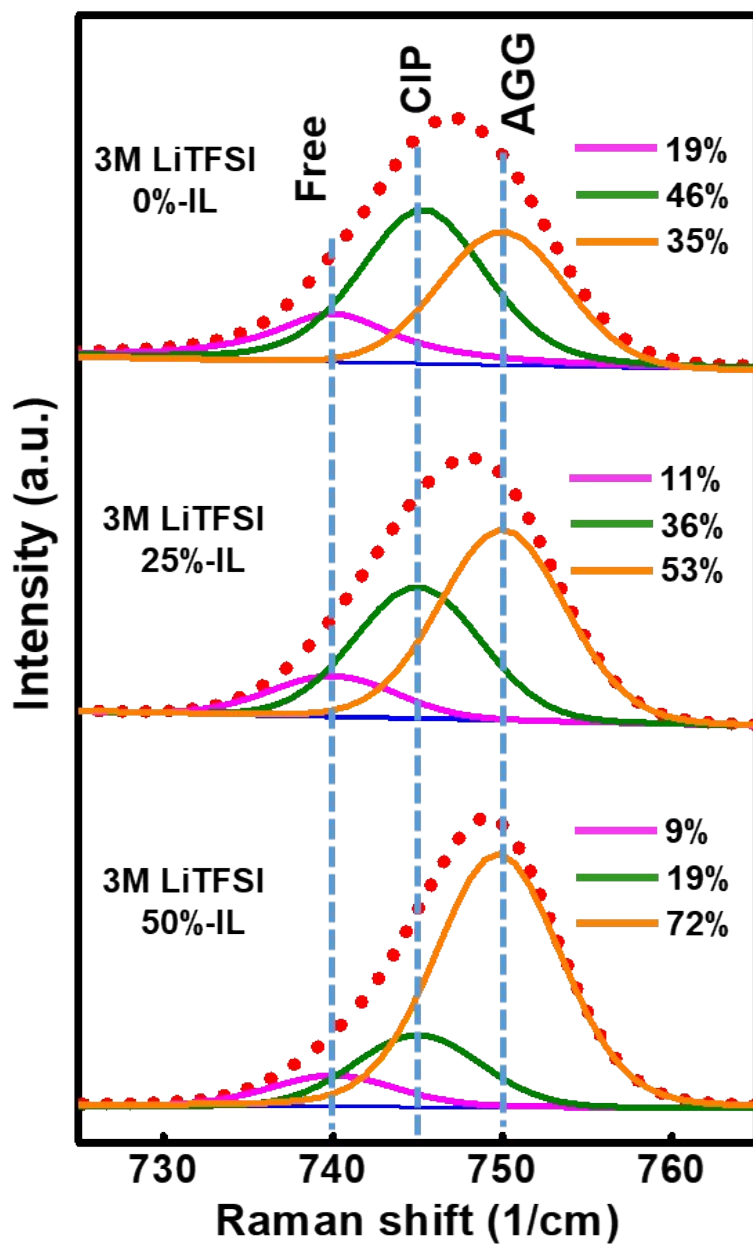

**Figure S4.** Raman spectra of 3 M LiTFSI/0%-IL, 3 M LiTFSI/25%-IL, and 3 M LiTFSI/50%-IL electrolytes.

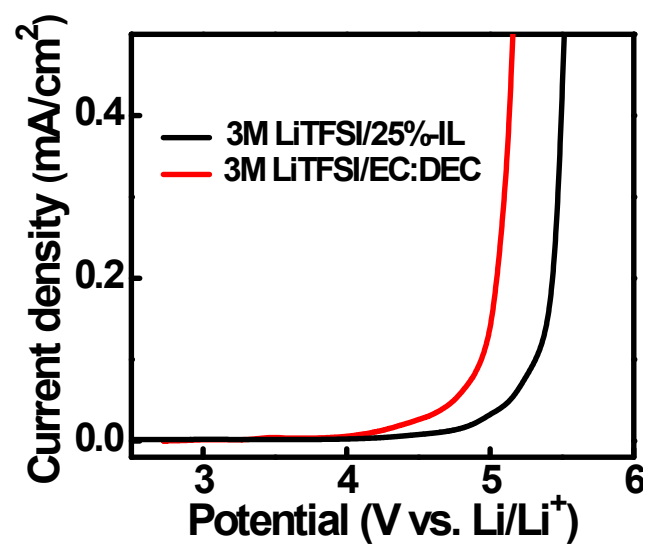

**Figure S5.** LSV curves of Pt electrodes recorded in 3 M LiTFSI/0%-IL and 3 M LiTFSI/25%-IL electrolytes with potential sweep rate of 1 mV s<sup>-1</sup>.

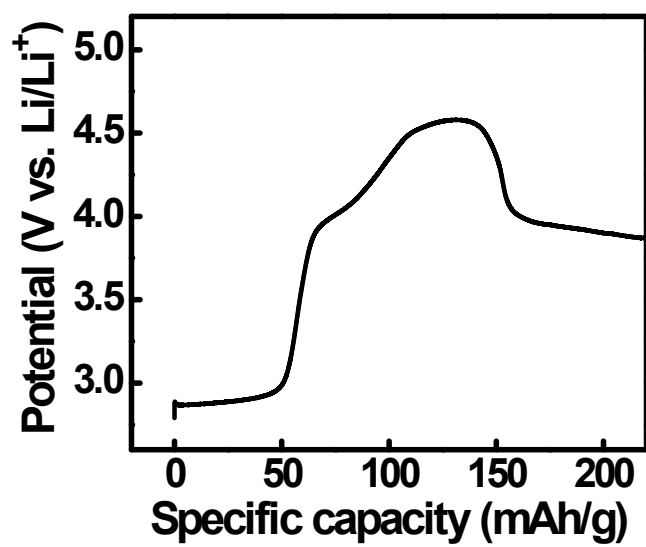

**Figure S6.** Charging curve of 3 M LiTFSI/0%-IL LNMO cell

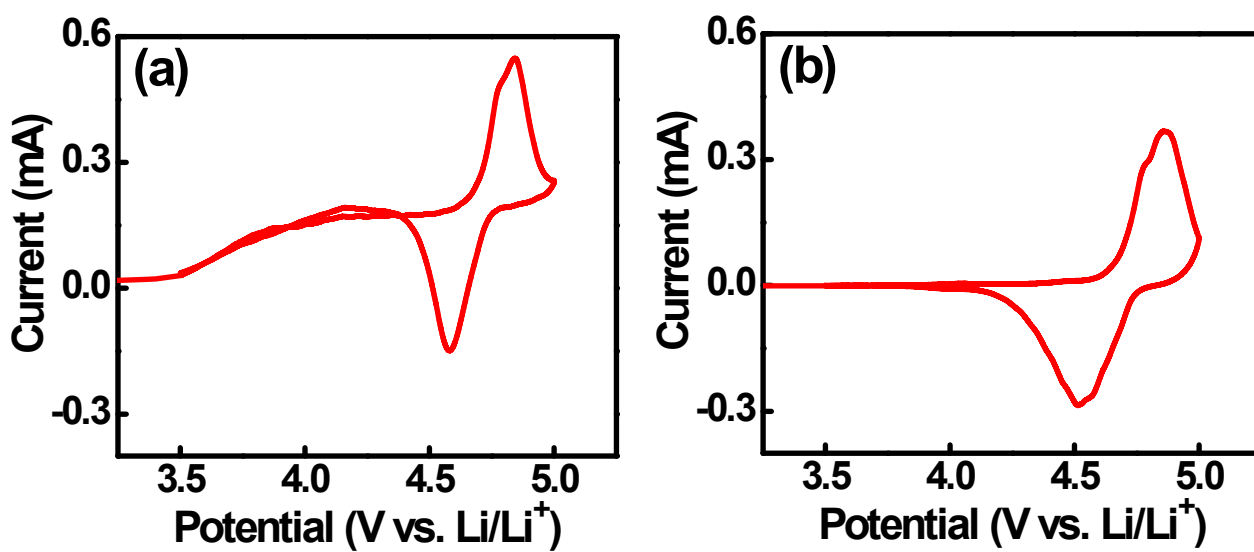

**Figure S7.** Cyclic voltammetry data of LNMO cells with (a) 3 M LiTFSI/0%-IL and (b) 3 M LiTFSI/25%-IL electrolytes recorded at 0.1 mV s<sup>-1</sup>.

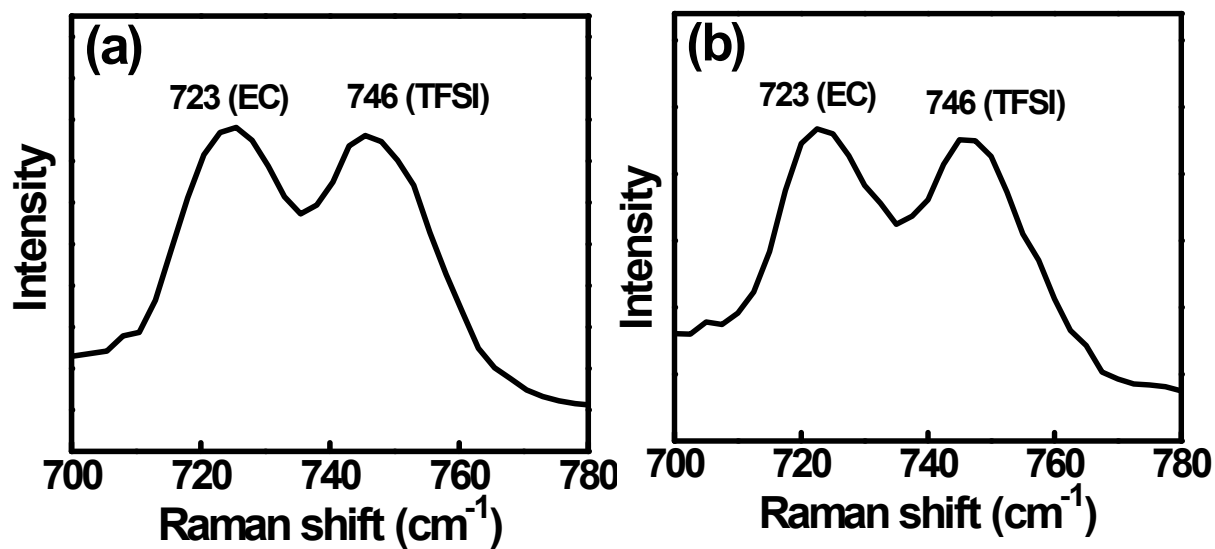

**Figure S8.** Raman spectra of (a) fresh 3 M LiTFSI/25%-IL electrolyte and (b) the same electrolyte after 20 charge-discharge cycles extracted from LNMO cell.



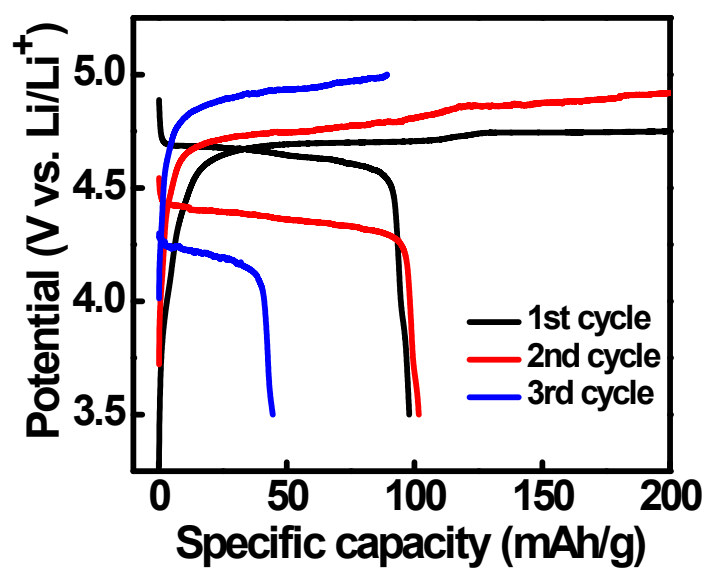

**Figure S9.** Charge-discharge curves of LNMO cell with 1 M LiPF<sub>6</sub>/EC:DEC electrolyte recorded at 0.1 C and 55 °C.
